# Supplementary material for: Long Noncoding RNA H19 Participates in the Regulation of Adipose-Derived Stem Cells Cartilage Differentiation
Source: Hindawi journal article supplement (doi:10.1155/2019/2139814), 2019-05-05

A

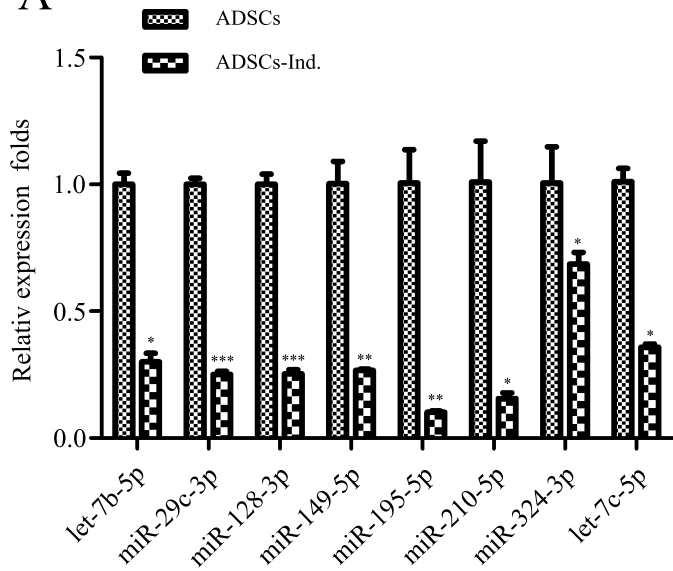

B

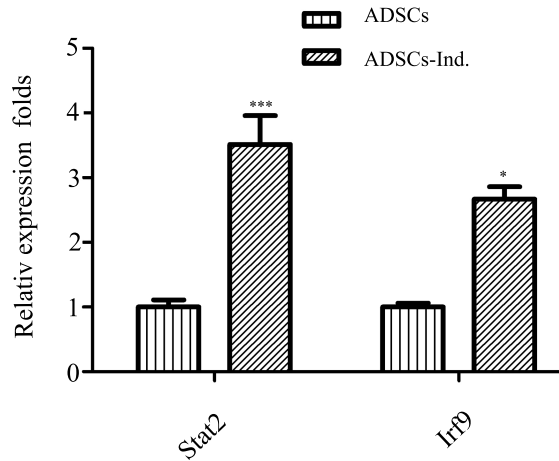

C

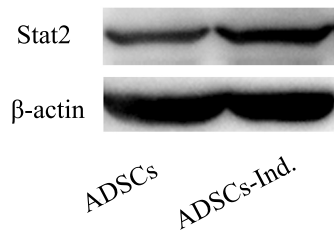

D

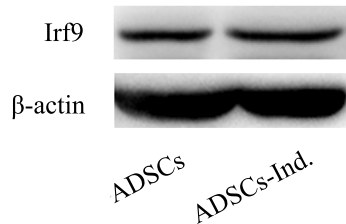

Supplement: f1 [file 2139814.f1.pdf]
